# Supplementary material
Source: publisher figshare collection journal article supplement (https://sage.figshare.com/ndownloader/files/18716144)
Supplement: Supplementary file 1 [file 18716144]

**Supplemental Materials**

The authors have proposed the following pages as supplemental materials. These materials would not be published as part of the article itself and, thus, would not count toward the total pages of the article. Instead, they would be published separately as a PDF and available for download from the publisher’s Website. The published article would include a hypertext link pointing to the supplemental materials.
